# Supplementary material for: Paraoxonase-1 Activity in Breast Cancer Patients Treated With Doxorubicin With or Without Trastuzumab
Source: PubMed Central journal article supplement — JACC Basic Transl Sci. 2021 Dec 15;7(1):1–10. doi: 10.1016/j.jacbts.2021.10.010 (PMC8807731; doi:10.1016/j.jacbts.2021.10.010), 2021-12-15
Supplement: mmc1.pdf [file mmc1.pdf]

## Supplemental Appendix

### Paraoxonase-1 Activity in Breast Cancer Patients Treated with Doxorubicin with or without Trastuzumab

| <b>Title</b>          | <b>Supplemental Appendix Page Number</b> |
|-----------------------|------------------------------------------|
| Supplemental Table 1  | 2                                        |
| Supplemental Table 2A | 3                                        |
| Supplemental Table 2B | 4                                        |
| Supplemental Table 3A | 5                                        |
| Supplemental Table 3B | 6                                        |
| Supplemental Table 4  | 7                                        |
| Supplemental Table 5  | 8                                        |
| Supplemental Figure 1 | 9                                        |

**Supplemental Table 1: Number of available measurements of paraoxonase and arylesterase at baseline, and at 1 and 2 months after doxorubicin initiation in the analytic population**

| <b>Biomarker</b> | <b>Overall</b>  |              |               | <b>Doxorubicin</b> |              |               | <b>Doxorubicin+Trastuzumab</b> |              |               |
|------------------|-----------------|--------------|---------------|--------------------|--------------|---------------|--------------------------------|--------------|---------------|
|                  | <b>Baseline</b> | <b>1</b>     | <b>2</b>      | <b>Baseline</b>    | <b>1</b>     | <b>2</b>      | <b>Baseline</b>                | <b>1</b>     | <b>2</b>      |
|                  |                 | <b>month</b> | <b>months</b> |                    | <b>month</b> | <b>months</b> |                                | <b>month</b> | <b>months</b> |
| Paraoxonase      | 225             | 208          | 198           | 185                | 169          | 161           | 40                             | 39           | 37            |
| Arylesterase     | 224             | 208          | 199           | 184                | 169          | 162           | 40                             | 39           | 37            |

**Supplemental Table 2A: Associations between baseline clinical variables and early changes in Pon activity levels.**

| <b>Variable</b>                                                                                                                                                                                                                                                                                                                                                                                                                                                                                                                                                                             | <b>Effect size* (95% CI)</b> | <b>P-value</b> |
|---------------------------------------------------------------------------------------------------------------------------------------------------------------------------------------------------------------------------------------------------------------------------------------------------------------------------------------------------------------------------------------------------------------------------------------------------------------------------------------------------------------------------------------------------------------------------------------------|------------------------------|----------------|
| Age, per 10 years                                                                                                                                                                                                                                                                                                                                                                                                                                                                                                                                                                           | 0.98 (0.96,1.01)             | 0.200          |
| Black race                                                                                                                                                                                                                                                                                                                                                                                                                                                                                                                                                                                  | 0.99 (0.92, 1.05)            | 0.670          |
| Disease stage                                                                                                                                                                                                                                                                                                                                                                                                                                                                                                                                                                               |                              |                |
| Stage 1                                                                                                                                                                                                                                                                                                                                                                                                                                                                                                                                                                                     | Ref                          |                |
| Stage 2                                                                                                                                                                                                                                                                                                                                                                                                                                                                                                                                                                                     | 1.06 (0.94,1.20)             | 0.334          |
| Stage 3 or 4                                                                                                                                                                                                                                                                                                                                                                                                                                                                                                                                                                                | 1.05 (0.93,1.18)             | 0.421          |
| Body mass index, per 5 Kg/m <sup>2</sup>                                                                                                                                                                                                                                                                                                                                                                                                                                                                                                                                                    | 1.03 (1.01,1.05)             | 0.004          |
| Current or past smoking                                                                                                                                                                                                                                                                                                                                                                                                                                                                                                                                                                     | 1.02 (0.98,1.07)             | 0.327          |
| Diabetes mellitus                                                                                                                                                                                                                                                                                                                                                                                                                                                                                                                                                                           | 1.00 (0.95,1.06)             | 0.952          |
| Hypertension                                                                                                                                                                                                                                                                                                                                                                                                                                                                                                                                                                                | 0.92 (0.80,1.06)             | 0.260          |
| Hyperlipidemia                                                                                                                                                                                                                                                                                                                                                                                                                                                                                                                                                                              | 1.01 (0.96,1.07)             | 0.606          |
| Statin use                                                                                                                                                                                                                                                                                                                                                                                                                                                                                                                                                                                  | 1.04 (0.98,1.10)             | 0.166          |
| ACEI/ARB or beta-blocker use                                                                                                                                                                                                                                                                                                                                                                                                                                                                                                                                                                | 1.07 (0.95,1.19)             | 0.260          |
| <p>Log-ratio of Pon relative to baseline was included as the dependent variable.</p> <p>*Exponentiated coefficients are presented and should be interpreted as the expected multiple of change in Pon levels relative to baseline per unit difference in the independent variable under consideration. Associations were modeled using repeated measures linear regression estimated via generalized estimating equations (GEE).</p> <p>ACEI = angiotensin converting enzyme inhibitor; ARB = angiotensin receptor blocker; CI=Confidence interval; Pon = paraoxonase; Ref = reference.</p> |                              |                |

**Supplemental Table 2B: Associations between baseline clinical variables and early changes in Aryl activity levels.**

| <b>Variable</b>                                                                                                                                                                                                                                                                                                                                                                                                                                                                                                                                                                                 | <b>Effect size* (95% CI)</b> | <b>P-value</b> |
|-------------------------------------------------------------------------------------------------------------------------------------------------------------------------------------------------------------------------------------------------------------------------------------------------------------------------------------------------------------------------------------------------------------------------------------------------------------------------------------------------------------------------------------------------------------------------------------------------|------------------------------|----------------|
| Age, per 10 years                                                                                                                                                                                                                                                                                                                                                                                                                                                                                                                                                                               | 0.98 (0.97,1.00)             | 0.050          |
| Black race                                                                                                                                                                                                                                                                                                                                                                                                                                                                                                                                                                                      | 0.99 (0.95,1.03)             | 0.631          |
| Disease stage                                                                                                                                                                                                                                                                                                                                                                                                                                                                                                                                                                                   |                              |                |
| Stage 1                                                                                                                                                                                                                                                                                                                                                                                                                                                                                                                                                                                         | Ref                          |                |
| Stage 2                                                                                                                                                                                                                                                                                                                                                                                                                                                                                                                                                                                         | 1.02 (0.96,1.09)             | 0.514          |
| Stage 3 or 4                                                                                                                                                                                                                                                                                                                                                                                                                                                                                                                                                                                    | 1.01 (0.94,1.09)             | 0.749          |
| Body mass index, per 5 Kg/m <sup>2</sup>                                                                                                                                                                                                                                                                                                                                                                                                                                                                                                                                                        | 1.01 (1.00,1.03)             | 0.076          |
| Current or past smoking                                                                                                                                                                                                                                                                                                                                                                                                                                                                                                                                                                         | 1.04 (1.01,1.08)             | 0.009          |
| Diabetes mellitus                                                                                                                                                                                                                                                                                                                                                                                                                                                                                                                                                                               | 0.98 (0.93,1.03)             | 0.450          |
| Hypertension                                                                                                                                                                                                                                                                                                                                                                                                                                                                                                                                                                                    | 0.95 (0.88,1.02)             | 0.184          |
| Hyperlipidemia                                                                                                                                                                                                                                                                                                                                                                                                                                                                                                                                                                                  | 1.05 (1.00,1.10)             | 0.053          |
| Statin use                                                                                                                                                                                                                                                                                                                                                                                                                                                                                                                                                                                      | 1.05 (0.99,1.11)             | 0.121          |
| ACEI/ARB or beta-blocker use                                                                                                                                                                                                                                                                                                                                                                                                                                                                                                                                                                    | 1.01 (0.94,1.09)             | 0.709          |
| <p>Log-ratio of Aryl relative to baseline was included as the dependent variable.</p> <p>*Exponentiated coefficients are presented and should be interpreted as the expected multiple of change in Aryl levels relative to baseline per unit difference in the independent variable under consideration. Associations were modeled using repeated measures linear regression estimated via generalized estimating equations (GEE).</p> <p>ACEI = angiotensin converting enzyme inhibitor; ARB = angiotensin receptor blocker, Aryl = arylesterase; CI=Confidence interval; Ref = reference.</p> |                              |                |

**Supplemental Table 3A: Number of available LVEF assessments at prespecified visit timepoints according cancer therapy regimen**

| <b>Visit</b>                                             | <b>Overall</b> | <b>Doxorubicin</b> | <b>Doxorubicin+<br/>Trastuzumab</b> |
|----------------------------------------------------------|----------------|--------------------|-------------------------------------|
| Baseline                                                 | 184            | 148                | 36                                  |
| 2 months                                                 |                | *                  | 31                                  |
| 5 months                                                 | 169            | 138                | 31                                  |
| 8 months                                                 |                | *                  | 27                                  |
| 12 months                                                | 151            | 119                | 32                                  |
| 24 months                                                | 124            | 97                 | 27                                  |
| ≥36 months                                               | 103            | 74                 | 29                                  |
| *Visit is not a study timepoint in the doxorubicin group |                |                    |                                     |

**Supplemental Table 3B: Number of available LVEF assessments at prespecified visit timepoints according to CTRCD**

| <b>Visit</b>                                                                                                                                      | <b>No CTRCD<br/>(N=150)</b> | <b>CTRCD<br/>(N=34)</b> |
|---------------------------------------------------------------------------------------------------------------------------------------------------|-----------------------------|-------------------------|
| Baseline                                                                                                                                          | 150                         | 34                      |
| 2 months*                                                                                                                                         | 21                          | 10                      |
| 5 months                                                                                                                                          | 137                         | 32                      |
| 8 months*                                                                                                                                         | 18                          | 9                       |
| 12 months                                                                                                                                         | 120                         | 31                      |
| 24 months                                                                                                                                         | 96                          | 28                      |
| ≥36 months                                                                                                                                        | 80                          | 23                      |
| *Numbers reflect available LVEF assessments in the doxorubicin+trastuzumab group only;<br>Visit is not a study timepoint in the doxorubicin group |                             |                         |

**Supplemental Table 4: Associations between change in Pon and Aryl levels from baseline and time to CTRCD according to race.**

| Biomarker<br>Activity<br>Level | Change from baseline at 1 month |             |                     |             | Change from baseline at 2 months |             |                     |             |
|--------------------------------|---------------------------------|-------------|---------------------|-------------|----------------------------------|-------------|---------------------|-------------|
|                                | Black Race                      |             | White/Other Race    |             | Black                            |             | White/Other         |             |
|                                | HR<br>(95% CI)                  | P-<br>value | HR<br>(95% CI)      | P-<br>value | HR<br>(95% CI)                   | P-<br>value | HR<br>(95% CI)      | P-<br>value |
| Pon                            | 1.03<br>(0.94,1.13)             | 0.537       | 1.11<br>(0.85,1.45) | 0.432       | 1.24<br>(0.89,1.74)              | 0.200       | 1.15<br>(0.99,1.35) | 0.072       |
| Aryl                           | 1.15<br>(0.89,1.49)             | 0.283       | 1.05<br>(0.84,1.30) | 0.677       | 1.18<br>(0.87,1.61)              | 0.292       | 1.10<br>(0.90,1.34) | 0.371       |

Hazard ratios should be interpreted per 10% increase in biomarker value from baseline to 1 or 2 months after doxorubicin initiation; Associations were modeled using Cox proportional hazards models; associations were adjusted for age, cancer therapy regimen and hypertension. Aryl = Arylesterase; CI = confidence interval; HR = hazard ratio; Pon = paraoxonase.

**Supplemental Table 5: Associations between change in Pon and Aryl levels from baseline and time to CTRCD according to age (cohort median age was used to define categories)**

| Biomarker<br>Activity<br>Level | Change from baseline at 1 month |             |                     |             | Change from baseline at 2 months |             |                     |             |
|--------------------------------|---------------------------------|-------------|---------------------|-------------|----------------------------------|-------------|---------------------|-------------|
|                                | Age <49                         |             | Age ≥49             |             | Age <49                          |             | Age ≥49             |             |
|                                | HR<br>(95% CI)                  | P-<br>value | HR<br>(95% CI)      | P-<br>value | HR<br>(95% CI)                   | P-<br>value | HR<br>(95% CI)      | P-<br>value |
| Pon                            | 1.09<br>(0.87,1.36)             | 0.447       | 0.98<br>(0.83,1.16) | 0.826       | 1.20<br>(0.95,1.52)              | 0.121       | 1.15<br>(0.96,1.36) | 0.122       |
| Aryl                           | 1.13<br>(0.92,1.39)             | 0.248       | 1.05<br>(0.85,1.31) | 0.635       | 1.21<br>(0.96,1.60)              | 0.103       | 1.02<br>(0.81,1.28) | 0.873       |

The median age across the cohort was 49 years. Hazard ratios should be interpreted per 10% increase in biomarker value from baseline to 1 or 2 months after doxorubicin initiation; Associations were modeled using Cox proportional hazards models; associations were adjusted for race, cancer therapy regimen and hypertension. Aryl = Arylesterase; CI = confidence interval; HR = hazard ratio; Pon = paraoxonase.



### Doxorubicin

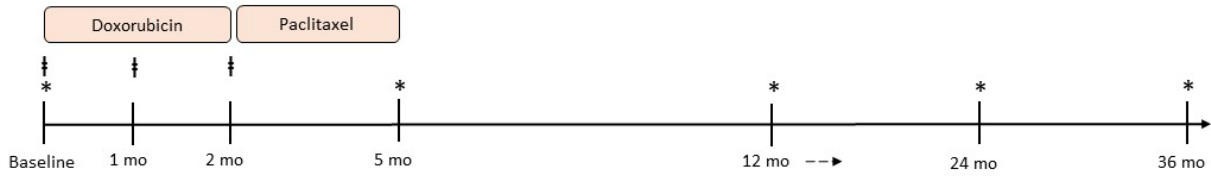

### Doxorubicin + Trastuzumab

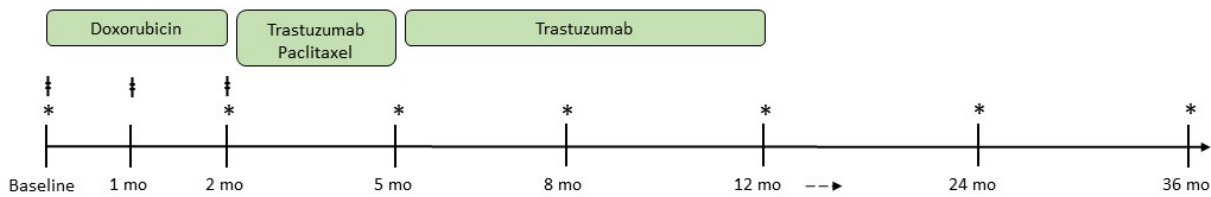

† Blood sample collected at visit

\* Transthoracic echocardiogram performed at visit

**Supplemental Figure 1: Biomarker sampling protocol according to treatment regimen.** Patients enrolled in the study received either Doxorubicin or Doxorubicin+Trastuzumab. Blood samples were collected at baseline, 1 month, and 2 months. Echocardiograms were performed periodically as indicated by asterisks in the figure.
